# Supplementary material for: Biodegradation of chlorpyrifos using isolates from contaminated agricultural soil, its kinetic studies
Source: Sci Rep. 2021 May 14;11:10320. doi: 10.1038/s41598-021-88264-x (PMC8121937; doi:10.1038/s41598-021-88264-x)
Supplement: Supplementary file 1 — Supplementary Tables. [file 41598_2021_88264_MOESM1_ESM.doc]

**Supplementary Material for**

**Biodegradation of chlorpyrifos using isolates form contaminated agricultural soil, its kinetic studies**

Muhammad Farhan1,*, Maqsood Ahmad2, Amina Kanwal3, Zahid Ali Butt3, Qaiser Farid Khan1, Syed Ali Raza 4,5, Haleema Qayyum1, Abdul Wahid6

1Sustainable Development Study Center, Government College University, Lahore, Pakistan

2Department of Environmental Sciences, Baluchistan University of Information Technology, Engineering and Management Sciences, Quetta, Pakistan

3Department of Botany, Government College Women University, Sialkot, Pakistan

4Directorate of Soil Reclamation, Irrigation Department, Government of the Punjab, Pakistan

5Department of Chemistry, Government College University, Lahore, Pakistan

6Department of Environmental Science, Bahauddin Zakariya University, Multan, Pakistan

*Email; m.farhan_gcu@yahoo.com, Cell #; +92 321 4122078, ORCID; https://orcid.org/0000-0002-1509-9723

**Table S1. Screening of isolates from soil of cotton fields on chlorpyrifos amended medium**

| **Isolates** | **Area** | **Chlorpyrifos concentration (mgL-1)**  **50 75 100 125 150 175** | | | | | |
| --- | --- | --- | --- | --- | --- | --- | --- |
| **Ct 1** | Multan | + + + | + + | - | - | - | - |
| **Ct 2** | Multan | + + | + + | + | - | - | - |
| **Ct 3** | Multan | + + + | + + + | + + + | + + + | + | + |
| **Ct 4** | Multan | + + + | + | + | - | - | - |
| **Ct 5** | Multan | + + + | + | - | - | - | - |
| **Ct 6** | Multan | + + + | + + + | + + + | + ++ | - | - |
| **Ct 7** | Multan | + + + | + + | + | - | - | - |
| **Ct 8** | Multan | + + + | + + | + + | + | - | - |
| **Ct 9** | Multan | + + | + | - | - | - | - |
| **Ct 11** | Multan | + + + | + + | + + | + | - | - |
| **Ct 12** | Multan | + + + | + | + | - | - | - |
| **Ct 13** | Multan | + + + | + | + | - | - | - |
| **Ct 14** | Multan | + + + | + | - | - | - | - |
| **Ct 15** | Multan | + + + | + | - | - | - | - |
| **Ct 16** | Multan | + | + | - | - | - | - |
| **Ct 17** | Multan | + + | + | - | - | - | - |
| **Ct 18** | Multan | + + + | + + + | + + | + | - | - |
| **Ct 19** | Multan | + + + | + | + | - | - | - |
| **Ct 20** | Multan | + + + | + + | + | - | - | - |
| **Ct 21** | Multan | + | - | - | - | - | - |
| **Ct 22** | Multan | + + + | + | - | - | - | - |
| **Ct 23** | Multan | + + | + | - | - | - | - |
| **Ct 24** | Bahawalpur | + + | + + | + | - | - | - |
| **Ct 25** | Bahawalpur | + + + | + + + | + + | + | - | - |
| **Ct 26** | Bahawalpur | + + + | + + | + | - | - | - |
| **Ct 29** | Bahawalpur | + + | + | - | - | - | - |
| **Ct 30** | Bahawalpur | + | + | - | - | - | - |
| **Ct 31** | Bahawalpur | + + | + + | + | - | - | - |
| **Ct 32** | Bahawalpur | + + + | + + + | + + | + | - | - |
| **Ct 33** | Bahawalpur | + + + | + + | + | - | - | - |
| **Ct 34** | Bahawalpur | + + | + + | + | - | - | - |
| **Ct 35** | Bahawalpur | + + | + + | + | + | - | - |
| **Ct 36** | Bahawalpur | + | + | - | - | - | - |
| **Ct 37** | Bahawalpur | + | - | - | - | - | - |
| **Ct 38** | Bahawalpur | + + | + + | + | + | - | - |
| **Ct 39** | Bahawalpur | + + + | + + + | + + | + | - | - |
| **Ct 41** | Bahawalnagar | + + + | + + + | + + | - | - | - |
| **Ct 42** | Bahawalnagar | + + + | + + + | + + | + | - | - |
| **Ct 43** | Bahawalnagar | + + + | + | + | - | - | - |
| **Ct 44** | Bahawalnagar | + + | + + | + | - | - | - |
| **Ct 45** | Bahawalnagar | + + | + + | - | - | - | - |
| **Ct 46** | Bahawalnagar | + + | + | - | - | - | - |
| **Ct 47** | Bahawalnagar | + + + | + + + | + + | - | - | - |
| **Ct 48** | Rahim Yar Khan | + + | + + | + | + | - | - |
| **Ct 49** | Rahim Yar Khan | + | + | - | - | - | - |
| **Ct 50** | Rahim Yar Khan | + + | + | - | - | - | - |
| **Ct 51** | Rahim Yar Khan | + + | + + | + | + | - | - |
| **Ct 52** | Rahim Yar Khan | + + | + | - | - | - | - |
| **Ct 53** | Rahim Yar Khan | + + | + + | + | - | - | - |
| **Ct 54** | Rahim Yar Khan | + + | + + | + | + | - | - |
| **Ct 55** | Rahim Yar Khan | + + + | + + + | + + | + | - | - |
| **Ct 56** | Rahim Yar Khan | + + + | + + | + | + | - | - |

+ + + “very good growth”

+ + “moderate growth”

+ “poor growth”

- “no growth”

**Table S2. Screening of Ct3 isolate for different organophosphate pesticides amended medium**

| **Pesticides types** | **Pesticides concentration (mgL-1)** | | | | | |
| --- | --- | --- | --- | --- | --- | --- |
| **5** | **7** | **9** | **11** | **13** | **15** |
| **Triazophos** | ++ | + | + | - | - | - |
| **Profenofos** | + | - | - | - | - | - |
| **Fenitrothion** | ++ | + | - | - | - | - |
| **Parathion** | + | - | - | - | - | - |
| **Diazinon** | + | + | - | - | - | - |

+ + + “very good growth”

+ + “moderate growth”

+ “poor growth”

- “no growth”

**Table S3 Summary of mass spectrometric data**

| **Sr. #** | **Retention time (min)** | **Product**  **(*m/z*)** | **Product ion**  **(*m/z*)** | **Purposed compound** | **Purposed structure** |
| --- | --- | --- | --- | --- | --- |
| 1 | 16.3 | 350 | 322, 294,198 | Chlorpyrifor (CP) | 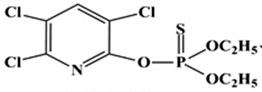 |
| 2 | 12.65 | 334 | 306, 278 | Chlorpyrifos-oxon (CPO) | 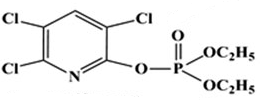 |
| 3. | 10.02 | 196 |  | 3 ,5 ,6-Trichloropyridin-2-ol (TCP) | 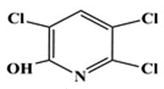 |
| 4. | 2.36 | 170 | 141, 95 | Diethyl thiophosphate (DETP) | 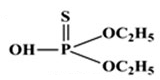 |
| 5 | <1.0 | 153 | 125, 79 | Diethyl phosphate | 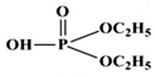 |

**Table S4. Biodegradation of chlorpyrifos in pot experiment under optimum conditions**

| **Experimental conditions** | **Parameters** | **Time (days)** | | | | | | |
| --- | --- | --- | --- | --- | --- | --- | --- | --- |
| **2** | **4** | **6** | **8** | **10** | **12** | **14** |
| CP = 100mgKg-1  Temp = 35oC  Carbon source = farm manure  Inoculum = 107 CFU | Survival of Bt3 | + | ++ | ++ | +++ | +++ | +++ | +++ |
| Chlorpyrifos biodegradation (%) | ND | 4 | 9 | 16 | 23 | 34 | 44 |

+ + + “very good growth”

+ + “moderate growth”

+ “poor growth”

- “no growth”

ND “not detected”

**Table S5. Selected factors with lower and higher experimental values**

| **Factors** | **Lower (-1)value** | **Higher (+1) value** |
| --- | --- | --- |
| Concentration (mgL-1) | 75 | 125 |
| Temperature (oC) | 30 | 40 |
| pH | 7 | 8.5 |
| Carbon source | 0 | 3 |
| Inoculum size (CFU/ml) | 104 | 108 |
